# Supplementary material
Source: PubMed Central journal article supplement (PMC3176348)
Supplement: Supp_Data.pdf [file Supp_Data.pdf]

## Supplementary Data

SUPPLEMENTARY TABLE S1. PUTATIVE MAMMALIAN THIOREDOXIN 1 DISULFIDE REDUCTION TARGETS

| <i>Target proteins</i>                                   | <i>Accession<br/>(Swiss-Prot)</i> | <i>Method</i>         | <i>Reference</i> |
|----------------------------------------------------------|-----------------------------------|-----------------------|------------------|
| <b>Metabolic proteins</b>                                |                                   |                       |                  |
| <b>Carbohydrate metabolism</b>                           |                                   |                       |                  |
| Acetyl-coenzyme A synthetase 2-like                      | Q99NB1                            | Tg mice, ICAT         | (75)             |
| Glyceraldehyde-3-phosphate dehydrogenase                 | P16858                            | Tg mice, ICAT         | (75)             |
| Insulin                                                  | P01308                            | Enzyme activity assay | (108)            |
| L-Lactate dehydrogenase B chain                          | P16125                            | Tg mice, ICAT         | (75)             |
| Phosphoglucomutase-1                                     | Q9D0F9                            | Tg mice, ICAT         | (75)             |
| Phosphoglycerate kinase 1                                | P09411                            | Tg mice, ICAT         | (75)             |
| Pyruvate dehydrogenase E1 component subunit $\alpha$     | P35486                            | Tg mice, ICAT         | (75)             |
| Pyruvate dehydrogenase E1 component subunit $\beta$      | Q9D051                            | Tg mice, ICAT         | (75)             |
| Triose-phosphate isomerase                               | P17751                            | Tg mice, ICAT         | (75)             |
| <b>Tricarboxylic acid cycle</b>                          |                                   |                       |                  |
| Citrate synthase                                         | Q9CZU6                            | Tg mice, ICAT         | (75)             |
| Isocitrate dehydrogenase                                 | P54071                            | Tg mice, ICAT         | (75)             |
| Malate dehydrogenase, mitochondrial                      | P08249                            | Tg mice, ICAT         | (75)             |
| <b>Fatty acid metabolism</b>                             |                                   |                       |                  |
| Carnitine O-palmitoyltransferase I                       | Q924X2                            | Tg mice, ICAT         | (75)             |
| $\Delta 3,5$ - $\Delta 2,4$ -Dienoyl-CoA isomerase       | O35459                            | Tg mice, ICAT         | (75)             |
| Enoyl-CoA hydratase                                      | Q8BH95                            | Tg mice, ICAT         | (75)             |
| Fatty acid-binding protein                               | P04117                            | Tg mice, ICAT         | (75)             |
| Long-chain-fatty-acid-CoA ligase 1                       | P41216                            | Tg mice, ICAT         | (75)             |
| Long-chain-specific acyl-CoA dehydrogenase               | P51174                            | Tg mice, ICAT         | (75)             |
| Very-long-chain-specific acyl-CoA dehydrogenase          | P50544                            | Tg mice, ICAT         | (75)             |
| <b>Oxidative phosphorylation</b>                         |                                   |                       |                  |
| ATP synthase $\epsilon$ chain                            | P56382                            | Tg mice, ICAT         | (75)             |
| Electron transfer flavoprotein-ubiquinone oxidoreductase | Q921G7                            | Tg mice, ICAT         | (75)             |
| NADH dehydrogenase protein 2                             | Q91WD5                            | Tg mice, ICAT         | (75)             |
| NADH dehydrogenase protein 6                             | P52503                            | Tg mice, ICAT         | (75)             |
| NADH dehydrogenase subcomplex subunit 10                 | Q99LC3                            | Tg mice, ICAT         | (75)             |
| Succinate dehydrogenase flavoprotein subunit             | Q8K2B3                            | Tg mice, ICAT         | (75)             |
| <b>Other metabolic proteins</b>                          |                                   |                       |                  |
| Aldose reductase                                         | P45376                            | Tg mice, ICAT         | (75)             |
| Aspartate aminotransferase                               | P05202                            | Tg mice, ICAT         | (75)             |
| Creatine kinase M-type                                   | P07310                            | Tg mice, ICAT         | (75)             |
| Creatine kinase, sarcomeric mitochondrial                | Q6P8J7                            | Tg mice, ICAT         | (75)             |
| Fumarylacetoacetate hydrolase                            | Q8R0F8                            | Tg mice, ICAT         | (75)             |
| Malate dehydrogenase, cytoplasmic                        | P14152                            | Tg mice, ICAT         | (75)             |
| Nucleoside-diphosphate kinase B                          | Q01768                            | Tg mice, ICAT         | (75)             |
| 2-Oxoglutarate dehydrogenase E1 component                | Q60597                            | Tg mice, ICAT         | (75)             |
| <b>Muscle/structural proteins</b>                        |                                   |                       |                  |
| Actin, $\alpha$ cardiac muscle                           | P68033                            | Tg mice, ICAT         | (75)             |
| Filamin-C                                                | Q8VHX6                            | Tg mice, ICAT         | (75)             |
| Four and a half LIM domains protein 2                    | O70433                            | Tg mice, ICAT         | (75)             |
| Myosin light polypeptide 3                               | P09542                            | Tg mice, ICAT         | (75)             |
| Myosin-6                                                 | Q02566                            | Tg mice, ICAT         | (75)             |
| Myosin-binding protein C                                 | O70468                            | Tg mice, ICAT         | (75)             |
| Obscurin                                                 | A2AAJ9                            | Tg mice, ICAT         | (75)             |
| Tropomyosin $\alpha$ -1 chain                            | P58771                            | Tg mice, ICAT         | (75)             |

(continued)

TABLE S1. (CONTINUED)

| Target proteins                                                                                     | Accession<br>(Swiss-Prot)                | Method                                                                             | Reference            |
|-----------------------------------------------------------------------------------------------------|------------------------------------------|------------------------------------------------------------------------------------|----------------------|
| <b>Redox/chaperone proteins</b>                                                                     |                                          |                                                                                    |                      |
| Apolipoprotein A-I-binding protein                                                                  | Q8K4Z3                                   | Tg mice, ICAT                                                                      | (75)                 |
| Dnaj homolog subfamily A member 1                                                                   | P31689                                   | Y2H, pull-down assay, Trx1 mutation, enzyme activity assay                         | (46)                 |
| Dnaj homolog subfamily A member 2                                                                   | Q9QYJ0                                   | Tg mice, ICAT                                                                      | (75)                 |
| Dnaj homolog subfamily A member 3                                                                   | Q99M87                                   | Tg mice, ICAT                                                                      | (75)                 |
| Dnaj homolog subfamily B member 5                                                                   | O75953                                   | DNA microarray, Tg mice, pull-down assays, IB, MS/MS                               | (3)                  |
| FAD-linked sulfhydryl oxidase ALR                                                                   | P55789                                   | EMSA, Co-IP, pull-down assay, Y2H, IB                                              | (145)                |
| 3-Mercaptopyruvate sulfurtransferase                                                                | P97532                                   | Trx1 mutation, enzyme activity assay                                               | (190)                |
| Methionine-R-sulfoxide reductase B3, mitochondrial                                                  | Q8IXL7                                   | Enzyme activity assay, IB                                                          | (125)                |
| Methionine-R-sulfoxide reductase B2, mitochondrial                                                  | Q78J03                                   | Enzyme activity assay, IB                                                          | (125)                |
| Peroxiredoxin 1                                                                                     | Q06830                                   | Peroxidase activity assay, EMSA                                                    | (39, 123)            |
| Peroxiredoxin 2                                                                                     | P32119                                   | Peroxidase activity assay                                                          | (39, 123)            |
| Peroxiredoxin 3                                                                                     | P30048                                   | Peroxidase activity assay                                                          | (39, 123)            |
| Peroxiredoxin 4                                                                                     | Q13162                                   | Peroxidase activity assay, IP                                                      | (200)                |
| Peroxiredoxin 5                                                                                     | P99029                                   | Tg mice, ICAT, peroxidase activity assay, Trx1 mutation                            | (75, 239, 284)       |
| Peptidyl-prolyl cis-trans isomerase A                                                               | P17742                                   | Tg mice, ICAT                                                                      | (75)                 |
| Peptidyl-prolyl cis-trans isomerase                                                                 | Q99KR7                                   | Tg mice, ICAT                                                                      | (75)                 |
| Protein DJ-1                                                                                        | Q99LX0                                   | Tg mice, ICAT                                                                      | (75)                 |
| Ribonucleoside-diphosphate reductase large subunit                                                  | P07742                                   | Enzyme activity assay                                                              | (12)                 |
| Thioredoxin-binding protein-2                                                                       | Q9H3M7                                   | Nonreducing gel electrophoresis, GST pull-down, enzyme activity assay, IB          | (210)                |
| <b>Others</b>                                                                                       |                                          |                                                                                    |                      |
| $\alpha$ 2-HS-glycoprotein                                                                          | P29699                                   | Tg mice, ICAT                                                                      | (75)                 |
| Calcineurin                                                                                         | Q08209                                   | Enzyme activity assay                                                              | (28)                 |
| Carbonic anhydrase III                                                                              | P14141                                   | Isoelectric focusing, Enzyme activity assay                                        | (40)                 |
| Rab GDP dissociation inhibitor $\beta$                                                              | Q61598                                   | Tg mice, ICAT                                                                      | (75)                 |
| Tyrosine phosphatase non-receptor type 2                                                            | P17706                                   | Enzyme activity assay, MS/MS                                                       | (41)                 |
| <b>Signaling/apoptosis proteins</b>                                                                 |                                          |                                                                                    |                      |
| Apoptosis signal-regulating kinase 1                                                                | Q99683                                   | IP, IB, IF, GST pull-down, Trx1 mutation, enzyme activity assay, Y2H, RNAi         | (152, 189, 226, 281) |
| cAMP-dependent protein kinase                                                                       | P17612( $\alpha$ ),<br>P22694( $\beta$ ) | Enzyme activity assay, IB                                                          | (53)                 |
| Caspase 3                                                                                           | P42574                                   | Enzyme activity assay, IB, FCA                                                     | (258)                |
| CD5 antigen-like                                                                                    | O43866                                   | Tg mice, IB, Trx1 mutation, 2DE, LC/MS/MS                                          | (115)                |
| COP9 signalosome complex subunit 5                                                                  | Q92905                                   | Y2H, GST pull-down, Co-IP, FRET                                                    | (113)                |
| Dual specificity protein phosphatase 6                                                              | Q16828                                   | Enzyme activity assay, HPLC, MS/MS                                                 | (240)                |
| Estrogen receptor                                                                                   | P03372                                   | EMSA, enzyme activity assay                                                        | (98)                 |
| Phosphatidylinositol-3,4,5-triphosphate 3-phosphatase and dual-specificity protein phosphatase PTEN | P60484                                   | IP, IB, enzyme activity assay, molecular docking and mutation studies, HPLC, MS/MS | (138, 179)           |
| POU domain, class 5, transcription factor 1                                                         | Q01860                                   | EMSA, disulfide cross-linking, IB                                                  | (86)                 |
| Ras                                                                                                 | P01112                                   | Enzyme activity assay, IF, IB                                                      | (132)                |
| Ras-specific guanine nucleotide-releasing factor 1                                                  | Q13972                                   | Enzyme activity assay, MS/MS                                                       | (242)                |
| T-cell surface glycoprotein CD4                                                                     | P01730                                   | Trx mutation, IB                                                                   | (173)                |
| Tumor necrosis factor receptor superfamily member 8                                                 | P28908                                   | Trx1 mutation, FCA, IF, IB                                                         | (235)                |
| Tyrosine-protein phosphatase non-receptor type 1                                                    | P18031                                   | IP, enzyme activity assay                                                          | (137)                |
| <b>Transcription regulators</b>                                                                     |                                          |                                                                                    |                      |
| DNA-(apurinic or apyrimidinic site) lyase (Ref-1)                                                   | P27695                                   | Trx1 mutation, IB, Mammalian two-hybrid assay                                      | (103)                |
| Glucocorticoid receptor                                                                             | P04150                                   | EMSA, IF                                                                           | (158)                |
| Heat-shock factor 1                                                                                 | Q00613                                   | EMSA, IB, enzyme activity assay                                                    | (117)                |
| Histone deacetylase 4                                                                               | P56524                                   | Pull-down assays, Trx1 reduction assay, IB, MS/MS                                  | (3)                  |

(continued)

TABLE S1. (CONTINUED)

| <i>Target proteins</i>                              | <i>Accession<br/>(Swiss-Prot)</i> | <i>Method</i>                                            | <i>Reference</i>    |
|-----------------------------------------------------|-----------------------------------|----------------------------------------------------------|---------------------|
| Hypoxia-inducible factor 1 alpha                    | Q16665                            | Y2H, GST pull-down, IF                                   | (58, 283)           |
| Nuclear factor NF-kappa-B                           | P19838                            | IF, Trx1 mutation, pull-down assay                       | IB, EMSA (104, 172) |
| Nuclear factor erythroid 2-related factor 2         | Q16236                            | IB, Trx1 mutation                                        | (93)                |
| Peroxisome proliferator-activated receptor alpha    | Q07869                            | Mammalian one-hybrid assay, IF, RNAi, EMSA,              | (150)               |
| Runt-related transcription factor 2                 | Q08775                            | EMSA                                                     | (5)                 |
| Transcription factor Sp1                            | P08047                            | EMSA, enzyme activity assay, luciferase reporter assay   | (27)                |
| <b>Transport/channel proteins</b>                   |                                   |                                                          |                     |
| ADP/ATP translocase 1                               | P48962                            | Tg mice, ICAT                                            | (75)                |
| Annexin A2-S100A10 heterotetramer                   | P07355                            | Enzyme activity assay, IB                                | (133)               |
| Chloride intracellular channel protein 4            | Q9QYB1                            | Tg mice, ICAT                                            | (75)                |
| Platelet glycoprotein 4                             | Q08857                            | Tg mice, ICAT                                            | (75)                |
| Sarcoplasmic/endoplasmic reticulum calcium ATPase 3 | Q64518                            | Tg mice, ICAT                                            | (75)                |
| Short transient receptor potential channel C1       | P48995                            | Electrophysiology assay, IB, enzyme activity assay, RNAi | (274)               |
| Short transient receptor potential channel C5       | Q9UL62                            | Electrophysiology assay, IB, enzyme activity assay, RNAi | (274)               |
| <b>Vasculature/iron-binding proteins</b>            |                                   |                                                          |                     |
| Apolipoprotein A-I                                  | P02647                            | Tg mice, IB, Trx1 mutation, 2DE, LC/MS/MS                | (115)               |
| Complement factor H                                 | P08603                            | Tg mice, IB, Trx1 mutation, 2DE, LC/MS/MS                | (115)               |
| Cytoplasmic aconitate hydratase                     | P21399                            | Enzyme activity assay, EMSA                              | (201)               |
| Endothelial nitric oxide synthase                   | P29474                            | Enzyme activity assay                                    | (209)               |
| Fibrinogen, gamma chain                             | P02679                            | Tg mice, IB, Trx1 mutation, 2DE, LC/MS/MS                | (115)               |
| Iron-responsive element-binding protein 2           | P48200                            | Enzyme activity assay                                    | (201)               |
| Serotransferrin                                     | Q92111                            | Tg mice, ICAT                                            | (75)                |
| Serum albumin                                       | P02768                            | Tg mice, IB, Trx1 mutation, 2DE, LC/MS/MS                | (115)               |

ATP, adenosine triphosphate; 2DE, 2-dimensional gel electrophoresis; Co-IP, coimmunoprecipitation; EMSA, electromobility shift assay; FAD, flavin adenine dinucleotide; FCA, flow cytometry assay; FRET, fluorescence resonance energy transfer; IB, immunoblot; ICAT, isotope-coded affinity tag; IF, immunofluorescence; IP, immunoprecipitation; LC/MS/MS, liquid chromatography/tandem mass spectrometry; NADH, nicotinic adenine dinucleotide; RNAi, RNA interference assay; Tg mice, Trx1 transgenic mice; Y2H, yeast two-hybrid assay.

SUPPLEMENTARY TABLE S2. PUTATIVE TARGETS OF THIOREDOXIN 1-MEDIATED TRANS- OR DENITROSYLATION

| Target                                                            | Accession<br>(Swiss-Prot) | Method                                                                                                                                                | Reference          |
|-------------------------------------------------------------------|---------------------------|-------------------------------------------------------------------------------------------------------------------------------------------------------|--------------------|
| <b>Transnitrosylation</b>                                         |                           |                                                                                                                                                       |                    |
| 40S ribosomal protein S3                                          | P23396                    | BST, LC/MS/MS                                                                                                                                         | (273)              |
| 60 kDa heat shock protein, mitochondrial                          | P10809                    | BST, 2DE, MS/MS, LC/MS/MS                                                                                                                             | (273)              |
| 60S ribosomal protein L23                                         | P62829                    | BST, LC/MS/MS, LC/MS/MS                                                                                                                               | (273)              |
| 78 kDa glucose-regulated protein                                  | P11021                    | BST, 2DE, MS/MS                                                                                                                                       | (273)              |
| Actin, cytoplasmic 1                                              | P60709                    | BST, 2DE, MS/MS                                                                                                                                       | (273)              |
| ADP/ATP translocase 3                                             | P12236                    | BST, LC/MS/MS                                                                                                                                         | (273)              |
| Alpha-2-HS-glycoprotein                                           | P02765                    | BST, LC/MS/MS                                                                                                                                         | (273)              |
| Alpha-actinin-4                                                   | O43707                    | BST, 2DE, MS/MS                                                                                                                                       | (273)              |
| Alpha-enolase                                                     | P06733                    | BST, 2DE, MS/MS, LC/MS/MS                                                                                                                             | (273)              |
| Annexin A2                                                        | P07355                    | BST, 2DE, MS/MS, LC/MS/MS                                                                                                                             | (273)              |
| Argininosuccinate synthase                                        | P00966                    | BST, 2DE, MS/MS                                                                                                                                       | (273)              |
| ATP synthase subunit alpha,<br>mitochondrial                      | P25705                    | BST, 2DE, MS/MS                                                                                                                                       | (273)              |
| Casp3                                                             | P42574                    | BST, IB, MS/MS, enzyme activity assay;<br>ProCasp3: BST, IP, IB, Trx mutation,<br>enzyme activity assay, isothermal<br>calorimetry, fluorimetry assay | (184, 185,<br>273) |
| Catalase                                                          | P04040                    | BST, 2DE, MS/MS                                                                                                                                       | (273)              |
| Cathepsin B                                                       | P07858                    | BST, LC/MS/MS                                                                                                                                         | (273)              |
| Creatine kinase S-type, mitochondrial                             | P17540                    | BST, 2DE, MS/MS                                                                                                                                       | (273)              |
| Elongation factor 1-gamma                                         | P26641                    | BST, 2DE, MS/MS                                                                                                                                       | (273)              |
| Elongation factor 2                                               | P13639                    | BST, 2DE, MS/MS, LC/MS/MS                                                                                                                             | (273)              |
| Elongation factor Tu, mitochondrial                               | P49411                    | BST, 2DE, MS/MS                                                                                                                                       | (273)              |
| Endothelial cell proteins                                         |                           | Saville-Griess assay, Trx1 mutation, IB,<br>enzyme activity assay                                                                                     | (88)               |
| Elongation factor 1-alpha 1                                       | P68104                    | BST, 2DE, MS/MS, LC/MS/MS                                                                                                                             | (273)              |
| Fascin                                                            | Q16658                    | BST, 2DE, MS/MS                                                                                                                                       | (273)              |
| Filamin-A                                                         | P21333                    | BST, LC/MS/MS                                                                                                                                         | (273)              |
| Fructose-bisphosphate aldolase A                                  | P04075                    | BST, 2DE, MS/MS                                                                                                                                       | (273)              |
| Glyceraldehyde-3-phosphate<br>dehydrogenase                       | P04406                    | BST, 2DE, MS/MS, LC/MS/MS                                                                                                                             | (273)              |
| Heat shock 70 kDa protein 1A/1B                                   | P08107                    | BST, 2DE, MS/MS                                                                                                                                       | (273)              |
| Heat shock cognate 71 kDa protein                                 | P11142                    | BST, 2DE, MS/MS, LC/MS/MS                                                                                                                             | (273)              |
| Heat shock protein HSP 90-beta                                    | P08238                    | BST, 2DE, MS/MS                                                                                                                                       | (273)              |
| Heterogeneous nuclear ribonucleoproteins<br>A2/B1                 | P22626                    | BST, LC/MS/MS                                                                                                                                         | (273)              |
| L-lactate dehydrogenase B chain                                   | P07195                    | BST, LC/MS/MS                                                                                                                                         | (273)              |
| Macrophage migration inhibitory factor                            | P14174                    | BST, LC/MS/MS                                                                                                                                         | (273)              |
| Moesin                                                            | P26038                    | BST, 2DE, MS/MS                                                                                                                                       | (273)              |
| Peptidyl-prolyl cis-trans isomerase A                             | P62937                    | BST, LC/MS/MS                                                                                                                                         | (273)              |
| Peroxiredoxin-1                                                   | Q06830                    | BST, 2DE, MS/MS, LC/MS/MS                                                                                                                             | (273)              |
| Peroxiredoxin-4                                                   | Q13162                    | BST, 2DE, MS/MS, LC/MS/MS                                                                                                                             | (273)              |
| Phosphoglycerate kinase 1                                         | P00558                    | BST, 2DE, MS/MS, LC/MS/MS                                                                                                                             | (273)              |
| Poly(rC)-binding protein 1                                        | Q15365                    | BST, LC/MS/MS                                                                                                                                         | (273)              |
| Protein SEC13 homolog                                             | P55735                    | BST, LC/MS/MS                                                                                                                                         | (273)              |
| Pyruvate carboxylase, mitochondrial                               | P11498                    | BST, 2DE, MS/MS                                                                                                                                       | (273)              |
| Pyruvate kinase isozymes M1/M2                                    | P14618                    | BST, 2DE, MS/MS, LC/MS/MS                                                                                                                             | (273)              |
| Serpin H1                                                         | P50454                    | BST, 2DE, MS/MS                                                                                                                                       | (273)              |
| Serum albumin                                                     | P02768                    | BST, 2DE, MS/MS                                                                                                                                       | (273)              |
| Small nuclear ribonucleoprotein Sm D3                             | P62318                    | BST, LC/MS/MS                                                                                                                                         | (273)              |
| Transketolase                                                     | P29401                    | BST, 2DE, MS/MS, LC/MS/MS                                                                                                                             | (273)              |
| Tubulin alpha-4A chain                                            | P68366                    | BST, 2DE, MS/MS, LC/MS/MS                                                                                                                             | (273)              |
| Tubulin, beta polypeptide,                                        | Q5JP53                    | BST, 2DE, MS/MS, LC/MS/MS                                                                                                                             | (273)              |
| Very long-chain specific acyl-CoA<br>dehydrogenase, mitochondrial | P49748                    | BST, 2DE, MS/MS                                                                                                                                       | (273)              |
| Vimentin                                                          | P08670                    | BST, LC/MS/MS                                                                                                                                         | (273)              |
| Voltage-dependent anion-selective<br>channel protein 2            | P45880                    | BST, 2DE, MS/MS                                                                                                                                       | (273)              |
| <b>Denitrosylation</b>                                            |                           |                                                                                                                                                       |                    |
| 14-3-3 protein beta/alpha                                         | P31946                    | SILAC, enzyme activity assay, BST, LC/MS/MS                                                                                                           | (23)               |
| 14-3-3 protein epsilon                                            | P62258                    | SILAC, enzyme activity assay, BST, LC/MS/MS                                                                                                           | (23)               |

(continued)

TABLE S2. (CONTINUED)

| <i>Target</i>                                                             | <i>Accession<br/>(Swiss-Prot)</i> | <i>Method</i>                                                                                            | <i>Reference</i>    |
|---------------------------------------------------------------------------|-----------------------------------|----------------------------------------------------------------------------------------------------------|---------------------|
| 14-3-3 protein theta                                                      | P27348                            | SILAC, enzyme activity assay, BST, LC/MS/MS                                                              | (23)                |
| 26S proteasome non-ATPase regulatory subunit 2                            | Q8VDM4                            | 2DE fluorescent switch, BST, MS/MS                                                                       | (257)               |
| 40S ribosomal protein SA                                                  | P14206                            | 2DE fluorescent switch, BST, MS/MS                                                                       | (257)               |
| 60 kDa heat shock protein, mitochondrial precursor                        | P10809                            | SILAC, enzyme activity assay, BST, LC/MS/MS                                                              | (23)                |
| 78 kDa glucose-regulated protein                                          | P20029                            | 2DE fluorescent switch, BST, MS/MS                                                                       | (257)               |
| Adenylosuccinate lyase                                                    | P30566                            | SILAC, enzyme activity assay, BST, LC/MS/MS                                                              | (23)                |
| Albumin                                                                   |                                   | ESR, potentiometric measurement, HPLC                                                                    | (247)               |
| Alpha-enolase                                                             | P06733                            | SILAC, enzyme activity assay, BST, LC/MS/MS                                                              | (23)                |
| Annexin A1                                                                | P04083                            | SILAC, enzyme activity assay, BST, LC/MS/MS                                                              | (23)                |
| Calcium-regulated heat-stable protein 1                                   | Q9Y2V2                            | SILAC, enzyme activity assay, BST, LC/MS/MS                                                              | (23)                |
| Casp3                                                                     | P42574                            | Enzyme activity assay, HPLC, Trx mutation, RNAi, MS, BST, GST pull-down, ESR, potentiometric measurement | (21, 184, 238, 247) |
| Casp9                                                                     | P55211                            | Trx mutation, RNAi, MS, BST, GST pull-down                                                               | (21)                |
| Cofilin-1                                                                 | P23528                            | SILAC, enzyme activity assay, BST, LC/MS/MS                                                              | (23)                |
| Complement C3                                                             | P01027                            | 2DE fluorescent switch, BST, MS/MS                                                                       | (257)               |
| Deoxyuridine 50-triphosphate nucleotidohydrolase, mitochondrial precursor | P33316                            | SILAC, enzyme activity assay, BST, LC/MS/MS                                                              | (23)                |
| Dihydropyrimidinase-related protein 2                                     | Q16555                            | SILAC, enzyme activity assay, BST, LC/MS/MS                                                              | (23)                |
| DnaJ homologue subfamily A member 1                                       | P31689                            | SILAC, enzyme activity assay, BST, LC/MS/MS                                                              | (23)                |
| Drebrin-like protein                                                      | Q9UJU6                            | SILAC, enzyme activity assay, BST, LC/MS/MS                                                              | (23)                |
| Elongation factor 1-gamma                                                 | P26641                            | SILAC, enzyme activity assay, BST, LC/MS/MS                                                              | (23)                |
| eNOS                                                                      | P29473                            | IB, gel filtration, enzyme activity assay                                                                | (218)               |
| Epoxide hydrolase 2                                                       | P34913                            | SILAC, enzyme activity assay, BST, LC/MS/MS                                                              | (23)                |
| Eukaryotic translation initiation factor 5A-1                             | P63241                            | SILAC, enzyme activity assay, BST, LC/MS/MS                                                              | (23)                |
| Ezrin-radixin-moesin-binding phosphoprotein 50                            | O14745                            | SILAC, enzyme activity assay, BST, LC/MS/MS                                                              | (23)                |
| F-actin-capping protein subunit beta                                      | P47756                            | SILAC, enzyme activity assay, BST, LC/MS/MS                                                              | (23)                |
| Far upstream element-binding protein 2                                    | Q92945                            | SILAC, enzyme activity assay, BST, LC/MS/MS                                                              | (23)                |
| Glutaredoxin-1                                                            | P35754                            | SILAC, enzyme activity assay, BST, LC/MS/MS                                                              | (23)                |
| Glycyl-tRNA synthetase                                                    | P41250                            | SILAC, enzyme activity assay, BST, LC/MS/MS                                                              | (23)                |
| GSNO                                                                      |                                   | ESR, potentiometric measurement, HPLC                                                                    | (247)               |
| GSNO                                                                      |                                   | Enzyme activity assay, HPLC                                                                              | (238)               |
| GSNO                                                                      |                                   | Enzyme activity assay, HPLC                                                                              | (196)               |
| Heat shock 70 kDa protein 4                                               | P34932                            | SILAC, enzyme activity assay, BST, LC/MS/MS                                                              | (23)                |
| Heat shock 70 kDa protein 4                                               | Q61316                            | 2DE fluorescent switch, BST, MS/MS                                                                       | (257)               |
| Heat shock cognate 71 kDa protein                                         | P63017                            | 2DE fluorescent switch, BST, MS/MS                                                                       | (257)               |
| HepG2 23-30 kDa proteins                                                  |                                   | Enzyme activity assay, HPLC                                                                              | (238)               |
| Heterogeneous nuclear ribonucleoprotein K                                 | P61978                            | SILAC, enzyme activity assay, BST, LC/MS/MS                                                              | (23)                |
| Inosine-50-monophosphate dehydrogenase 2                                  | P12268                            | SILAC, enzyme activity assay, BST, LC/MS/MS                                                              | (23)                |
| Lactoylglutathione lyase                                                  | Q04760                            | SILAC, enzyme activity assay, BST, LC/MS/MS                                                              | (23)                |
| Leucyl-cystinyl aminopeptidase                                            | Q9UIQ6                            | SILAC, enzyme activity assay, BST, LC/MS/MS                                                              | (23)                |
| Metallothionein                                                           |                                   | ESR, potentiometric measurement, HPLC                                                                    | (247)               |
| Multifunctional protein ADE2                                              | P22234                            | SILAC, enzyme activity assay, BST, LC/MS/MS                                                              | (23)                |
| Myosin light polypeptide 6                                                | P60660                            | SILAC, enzyme activity assay, BST, LC/MS/MS                                                              | (23)                |
| Nuclear autoantigenic sperm protein                                       | P49321                            | SILAC, enzyme activity assay, BST, LC/MS/MS                                                              | (23)                |
| Nuclear migration protein nudC                                            | Q9Y266                            | SILAC, enzyme activity assay, BST, LC/MS/MS                                                              | (23)                |
| Nucleolin                                                                 | P19338                            | SILAC, enzyme activity assay, BST, LC/MS/MS                                                              | (23)                |
| NudC domain-containing protein 2                                          | Q8WVJ2                            | SILAC, enzyme activity assay, BST, LC/MS/MS                                                              | (23)                |
| Peptidyl-prolyl cis-trans isomerase A                                     | P62937                            | SILAC, enzyme activity assay, BST, LC/MS/MS                                                              | (23)                |
| D-3-phosphoglycerate dehydrogenase                                        | O43175                            | SILAC, enzyme activity assay, BST, LC/MS/MS                                                              | (23)                |
| Plasminogen activator inhibitor 1 RNA-binding protein                     | Q8NC51                            | SILAC, enzyme activity assay, BST, LC/MS/MS                                                              | (23)                |
| Plastin-2                                                                 | P13796                            | SILAC, enzyme activity assay, BST, LC/MS/MS                                                              | (23)                |
| Proteasome activator complex subunit 2                                    | Q9UL46                            | SILAC, enzyme activity assay, BST, LC/MS/MS                                                              | (23)                |

(continued)

TABLE S2. (CONTINUED)

| <i>Target</i>                                                                    | <i>Accession<br/>(Swiss-Prot)</i> | <i>Method</i>                                              | <i>Reference</i> |
|----------------------------------------------------------------------------------|-----------------------------------|------------------------------------------------------------|------------------|
| Protein ADRM1                                                                    | Q16186                            | SILAC, enzyme activity assay, BST, LC/MS/MS                | (23)             |
| Protein disulfide-isomerase                                                      | P09103                            | 2DE fluorescent switch, BST, MS/MS                         | (257)            |
| Protein disulfide-isomerase A3                                                   | P27773                            | 2DE fluorescent switch, BST, MS/MS                         | (257)            |
| Protein kinase C                                                                 | P05771                            | Enzyme activity assay, IB, IF                              | (121)            |
| Protein phosphatase 1G                                                           | O15355                            | SILAC, enzyme activity assay, BST, LC/MS/MS                | (23)             |
| PTP1B                                                                            | P18031                            | Trx cysteine mutant, RNAi, MS, BST, GST<br>pull-down assay | (21)             |
| Putative nucleoside diphosphate kinase                                           | P22392                            | SILAC, enzyme activity assay, BST, LC/MS/MS                | (23)             |
| Ran-specific GTPase-activating protein                                           | P43487                            | SILAC, enzyme activity assay, BST, LC/MS/MS                | (23)             |
| Rap1 GTPase-GDP dissociation stimulator                                          | P52306                            | SILAC, enzyme activity assay, BST, LC/MS/MS                | (23)             |
| RhoA(SNO) <sub>6</sub>                                                           |                                   | Enzyme activity assay, HPLC                                | (238)            |
| Ribonuclease inhibitor                                                           | Q91VI7                            | 2DE fluorescent switch, BST, MS/MS                         | (257)            |
| Serine/threonine-protein phosphatase 2A<br>65 kDa regulatory subunit A R isoform | P30153                            | SILAC, enzyme activity assay, BST, LC/MS/MS                | (23)             |
| Sialic acid synthase                                                             | Q9NR45                            | SILAC, enzyme activity assay, BST, LC/MS/MS                | (23)             |
| S-nitrosohomocysteine (HcysSNO)                                                  |                                   | Enzyme activity assay, HPLC                                | (238)            |
| S-nitroso-L-cysteine (CysSNO)                                                    |                                   | Enzyme activity assay, HPLC                                | (238)            |
| S-nitroso-L-cysteine ethyl ester (SNCEE)                                         |                                   | Enzyme activity assay, HPLC                                | (238)            |
| T-complex protein 1 subunit beta                                                 | P78371                            | SILAC, enzyme activity assay, BST, LC/MS/MS                | (23)             |
| Tubulin-tyrosine ligase-like protein 12                                          | Q14166                            | SILAC, enzyme activity assay, BST, LC/MS/MS                | (23)             |
| Ubiquitin carboxyl-terminal hydrolase 5                                          | P56399                            | 2DE fluorescent switch, BST, MS/MS                         | (257)            |
| Ubiquitin-like modifier-activating enzyme                                        | Q02053                            | 2DE fluorescent switch, BST, MS/MS                         | (257)            |

BST, biotin switch technique; Casp3, caspase 3; eNOS, endothelial nitric oxide synthase; ESR, electron spin resonance; HPLC, high performance (pressure) liquid chromatography; GSNO, nitrosoglutathione; MS/MS, tandem mass spectrometry; PTP1B, protein tyrosine phosphatase 1B; SILAC, stable isotope labeling by amino acids in cell culture.
